# Supplementary material
Source: PubMed Central journal article supplement (PMC9574171)
Supplement: 424_2022_2760_MOESM1_ESM.pdf [file 424_2022_2760_MOESM1_ESM.pdf]

**Table - Risk of bias assessment of each study**

| <i>Reference</i>                 | <i>Absence of allocation secrecy</i> | <i>Absence of masking (blinding)</i> | <i>Incomplete follow-up</i> | <i>Selective reporting of outcomes</i> | <i>Other limitations</i> | <i>Quality</i> |
|----------------------------------|--------------------------------------|--------------------------------------|-----------------------------|----------------------------------------|--------------------------|----------------|
| Al Shaqsi <i>et al.</i> , 2012   | No                                   | Yes                                  | No                          | No                                     | No                       | Moderated      |
| Alonso <i>et al.</i> , 2010      | No                                   | Yes                                  | No                          | No                                     | No                       | Moderated      |
| Alonso <i>et al.</i> , 2012      | No                                   | Yes                                  | No                          | No                                     | No                       | Moderated      |
| Bere <i>et al.</i> , 2015        | No                                   | Yes                                  | No                          | No                                     | No                       | Moderated      |
| Bergendiova <i>et al.</i> , 2011 | No                                   | No                                   | No                          | Yes                                    | No                       | Moderated      |
| Blume <i>et al.</i> , 2018       | No                                   | Yes                                  | No                          | No                                     | No                       | Moderated      |
| Borges <i>et al.</i> , 2018      | No                                   | Yes                                  | No                          | No                                     | No                       | Moderated      |
| Brisola <i>et al.</i> , 2020     | No                                   | Yes                                  | No                          | No                                     | No                       | Moderated      |
| Broadbent <i>et al.</i> , 2011   | No                                   | Yes                                  | No                          | No                                     | No                       | Moderated      |
| Brunelli <i>et al.</i> , 2014    | No                                   | Yes                                  | No                          | No                                     | No                       | Moderated      |
| Canto <i>et al.</i> , 2018       | No                                   | Yes                                  | No                          | No                                     | No                       | Moderated      |
| Carol <i>et al.</i> , 2011       | No                                   | No                                   | Yes                         | No                                     | No                       | Moderated      |
| Carrilo <i>et al.</i> , 2008     | No                                   | No                                   | No                          | No                                     | No                       | High           |
| Costa <i>et al.</i> , 2005       | No                                   | Yes                                  | No                          | No                                     | No                       | Moderated      |
| Cox <i>et al.</i> , 2004         | No                                   | No                                   | No                          | No                                     | No                       | High           |
| Cox <i>et al.</i> , 2010         | No                                   | No                                   | No                          | No                                     | No                       | High           |
| Crooks <i>et al.</i> , 2006      | No                                   | No                                   | Yes                         | No                                     | No                       | Moderated      |
| Crooks <i>et al.</i> , 2010      | No                                   | No                                   | No                          | No                                     | No                       | High           |
| Eda <i>et al.</i> , 2018         | No                                   | Yes                                  | No                          | No                                     | No                       | Moderated      |
| Fahlman <i>et al.</i> , 2004     | No                                   | Yes                                  | No                          | No                                     | No                       | Moderated      |
| Filaire <i>et al.</i> , 2003     | No                                   | Yes                                  | No                          | No                                     | No                       | Moderated      |
| Gleeson <i>et al.</i> , 1995     | No                                   | Yes                                  | No                          | No                                     | No                       | Moderated      |
| Gleeson <i>et al.</i> , 1999     | No                                   | Yes                                  | No                          | No                                     | No                       | Moderated      |
| Gomez <i>et al.</i> , 2005       | No                                   | Yes                                  | No                          | No                                     | No                       | Moderated      |
| Ihalainen <i>et al.</i> , 2016   | No                                   | Yes                                  | No                          | No                                     | No                       | Moderated      |
| Kunz <i>et al.</i> , 2015        | No                                   | Yes                                  | No                          | No                                     | No                       | Moderated      |
| Li <i>et al.</i> , 2007          | No                                   | Yes                                  | No                          | No                                     | No                       | Moderated      |
| Libicz <i>et al.</i> , 2006      | No                                   | Yes                                  | No                          | No                                     | No                       | Moderated      |
| Louis <i>et al.</i> , 2016       | No                                   | Yes                                  | No                          | No                                     | No                       | Moderated      |
| Luna <i>et al.</i> , 2011*       | No                                   | No                                   | No                          | No                                     | No                       | High           |
| Mackinnon, <i>et al.</i> , 1993a | No                                   | Yes                                  | No                          | No                                     | No                       | Moderated      |
| Mackinnon <i>et al.</i> , 1993b  | No                                   | Yes                                  | No                          | No                                     | No                       | Moderated      |
| Mackinnon <i>et al.</i> , 1994   | No                                   | Yes                                  | No                          | No                                     | No                       | Moderated      |
| Mah <i>et al.</i> , 2020         | No                                   | No                                   | Yes                         | No                                     | No                       | Moderated      |
| Marinkovic <i>et al.</i> , 2016  | No                                   | No                                   | Yes                         | No                                     | No                       | Moderated      |
| Martins <i>et al.</i> , 2009     | No                                   | Yes                                  | No                          | No                                     | No                       | Moderated      |
| McFarlin <i>et al.</i> , 2013    | No                                   | No                                   | Yes                         | No                                     | No                       | Moderated      |
| Moreira <i>et al.</i> , 2011a    | No                                   | Yes                                  | No                          | No                                     | No                       | Moderated      |
| Moreira <i>et al.</i> , 2011b    | No                                   | Yes                                  | No                          | No                                     | No                       | Moderated      |
| Moreira <i>et al.</i> , 2013a    | No                                   | Yes                                  | No                          | No                                     | No                       | Moderated      |

|                                   |    |     |    |    |    |           |
|-----------------------------------|----|-----|----|----|----|-----------|
| Moreira <i>et al.</i> , 2013b     | No | Yes | No | No | No | Moderated |
| Murase <i>et al.</i> , 2015       | No | Yes | No | No | No | Moderated |
| Nehlsen <i>et al.</i> , 2002      | No | No  | No | No | No | High      |
| Nieman <i>et al.</i> , 1993       | No | Yes | No | No | No | Moderated |
| Nieman <i>et al.</i> , 2000       | No | Yes | No | No | No | Moderated |
| Nieman <i>et al.</i> , 2003       | No | Yes | No | No | No | Moderated |
| Nieman <i>et al.</i> , 2014       | No | Yes | No | No | No | Moderated |
| Novas <i>et al.</i> , 2003        | No | Yes | No | No | No | Moderated |
| Obasi <i>et al.</i> , 2012        | No | Yes | No | No | No | Moderated |
| Orysiak <i>et al.</i> , 2018      | No | Yes | No | No | No | Moderated |
| Owen <i>et al.</i> , 2016         | No | Yes | No | No | No | Moderated |
| Pacque <i>et al.</i> , 2007       | No | Yes | No | No | No | Moderated |
| Peters <i>et al.</i> , 2010       | No | Yes | No | No | No | Moderated |
| Putlur <i>et al.</i> , 2004       | No | Yes | No | No | No | Moderated |
| Pyne <i>et al.</i> , 1995         | No | Yes | No | No | No | Moderated |
| Rama <i>et al.</i> , 2012         | No | Yes | No | No | No | Moderated |
| Reid <i>et al.</i> , 2001         | No | Yes | No | No | No | Moderated |
| Rosa <i>et al.</i> , 2013         | No | Yes | No | No | No | Moderated |
| Sari-Sarraf, <i>et al.</i> , 2006 | No | Yes | No | No | No | Moderated |
| Steerenberg <i>et al.</i> , 1997  | No | Yes | No | No | No | Moderated |
| Thornton <i>et al.</i> , 2016     | No | Yes | No | No | No | Moderated |
| Tiollier <i>et al.</i> , 2004     | No | Yes | No | No | No | Moderated |
| Vardiman <i>et al.</i> , 2011     | No | Yes | No | No | No | Moderated |
| Whitham <i>et al.</i> , 2006      | No | Yes | No | No | No | Moderated |
| Zakovska <i>et al.</i> , 2017     | No | Yes | No | No | No | Moderated |
